# Supplementary figures and images for: Composition and Function of Chicken Gut Microbiota
Source: MDPI journal article supplement (doi:10.3390/ani10010103), 2020-01-08

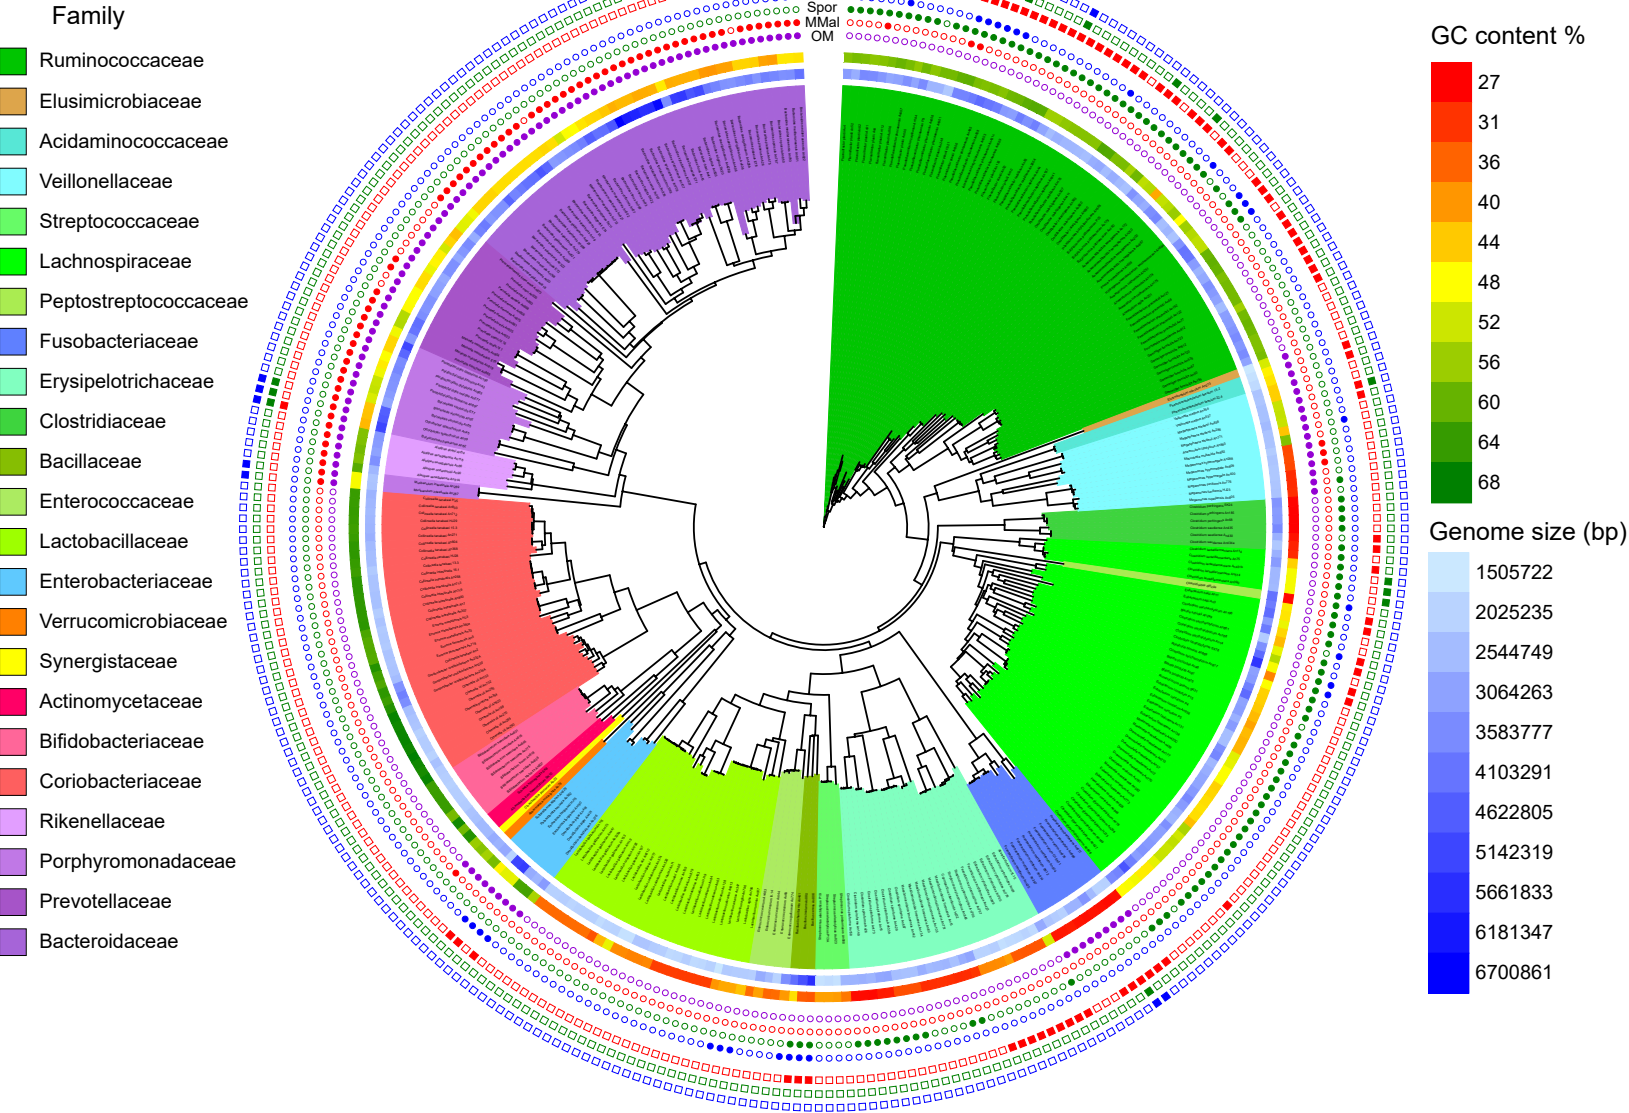

Supplement: s1 [file s1]
